# Supplementary material for: Structural isomerism induces pH dependent AIE-coupled ESIPT: an in-depth spectroscopic exploration with application in amine vapor sensing
Source: Royal Society of Chemistry journal article supplement (doi:10.1039/d3cp01703f), 2023-01-01
Supplement: d3cp01703f1.pdf [file d3cp01703f1.pdf]

## Supporting Information

### Structural Isomerism Induces pH Dependent AIE Coupled ESIPT: An In-Depth Spectroscopic Exploration With Application In Amine Vapor Sensing

Arghyadeep Bhattacharyya<sup>1a,b</sup>, Viki Bhakta<sup>1a</sup>, Nikhil Guchhait<sup>\*a</sup>

<sup>1</sup> Equal Contribution, \* Corresponding author

<sup>a</sup> Department of Chemistry, University of Calcutta, 92, A.P.C. Road, Kolkata, 700009, India

<sup>b</sup> Current address: Departamento de Química Física, Facultad de Ciencias Ambientales y Bioquímica, and INAMOL, Universidad de Castilla-La Mancha, Avenida Carlos III, S.N., 45071 Toledo, Spain

#### Contents

1. NMR spectra of 3BTHMB in CDCl<sub>3</sub>
2. ESI-MS of 3BTHMB
3. Table S1 for crystallographic parameters of 3BTHMB.
4. ORTEP diagram of 3BTHMB.
5. Various types of Hydrogen bonded forms possible in 3BTHMB.
6. CIE diagram of 3BTHMB in various solvents, acid effect.
7. Lifetime emission decays of 3BTHMB in various solvents (10 μM) for the entire spectral range.
8. Table for Excited state lifetime parameters of 3BTHMB in various solvents.
9. pK<sub>a</sub> calculation for 3BTHMB
10. Table for Excited state lifetime parameters of 3BTHMB at pH 4.2.
11. CIE coordinates in at 4 pH values.
12. Emission spectra corresponding to amine vapor detection and subsequent regeneration

### 1. NMR spectra of 3BTTHMB in CDCl<sub>3</sub>

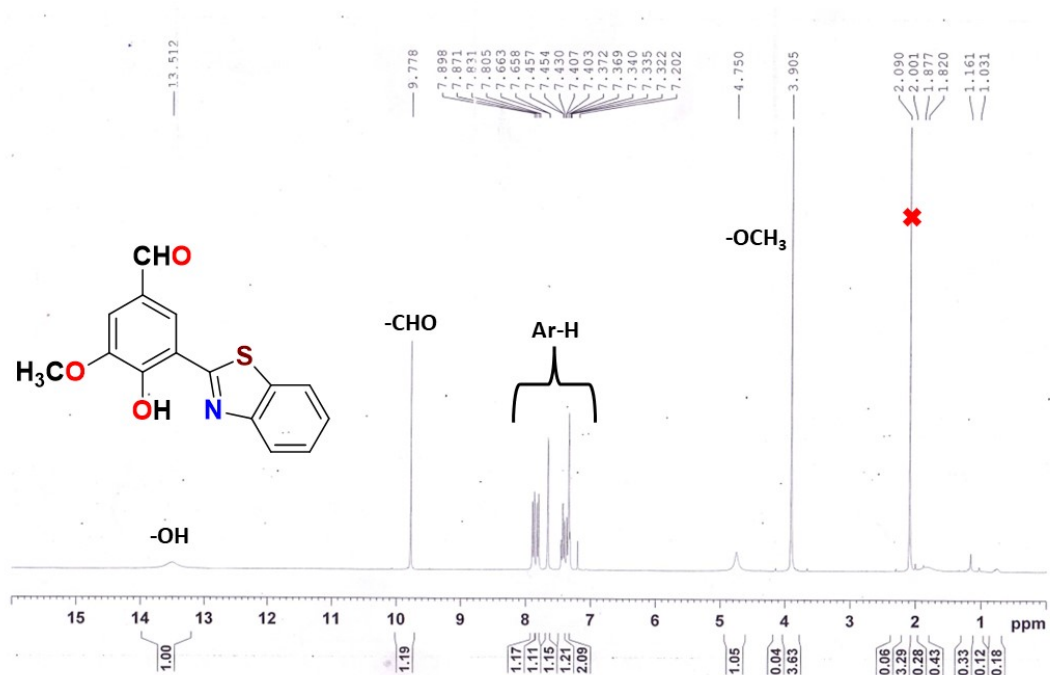

**Figure S1:** <sup>1</sup>H NMR spectrum of 3BTTHMB in CDCl<sub>3</sub>. (× signifies peak for acetone).

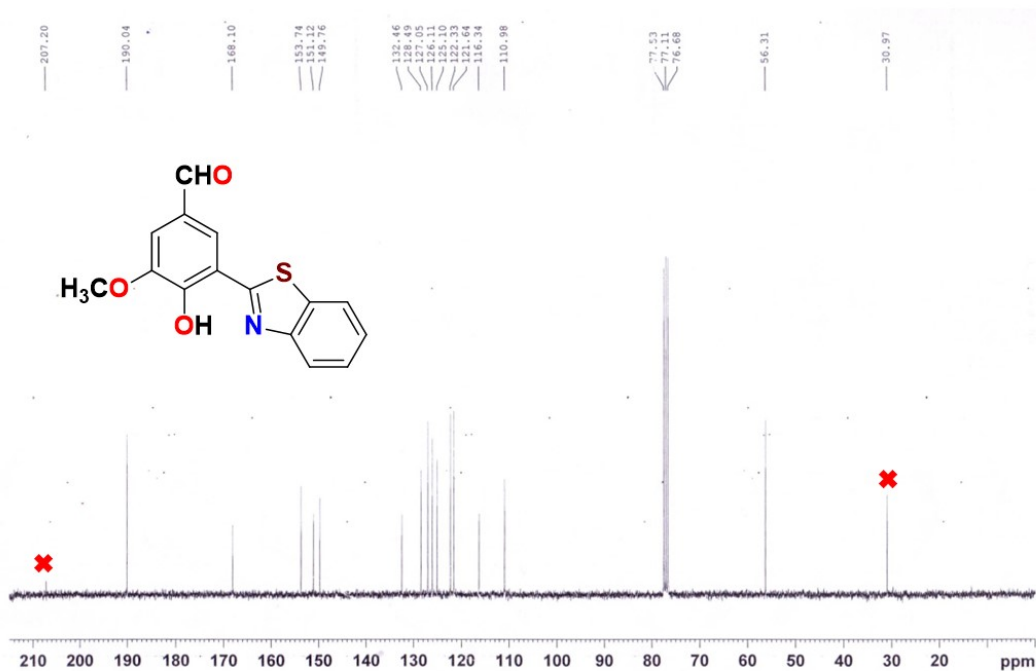

**Figure S2:** <sup>13</sup>C NMR spectrum of 3BTTHMB in CDCl<sub>3</sub>. (× signifies peak for acetone).

## 2. ESI-MS of 3BTHMB

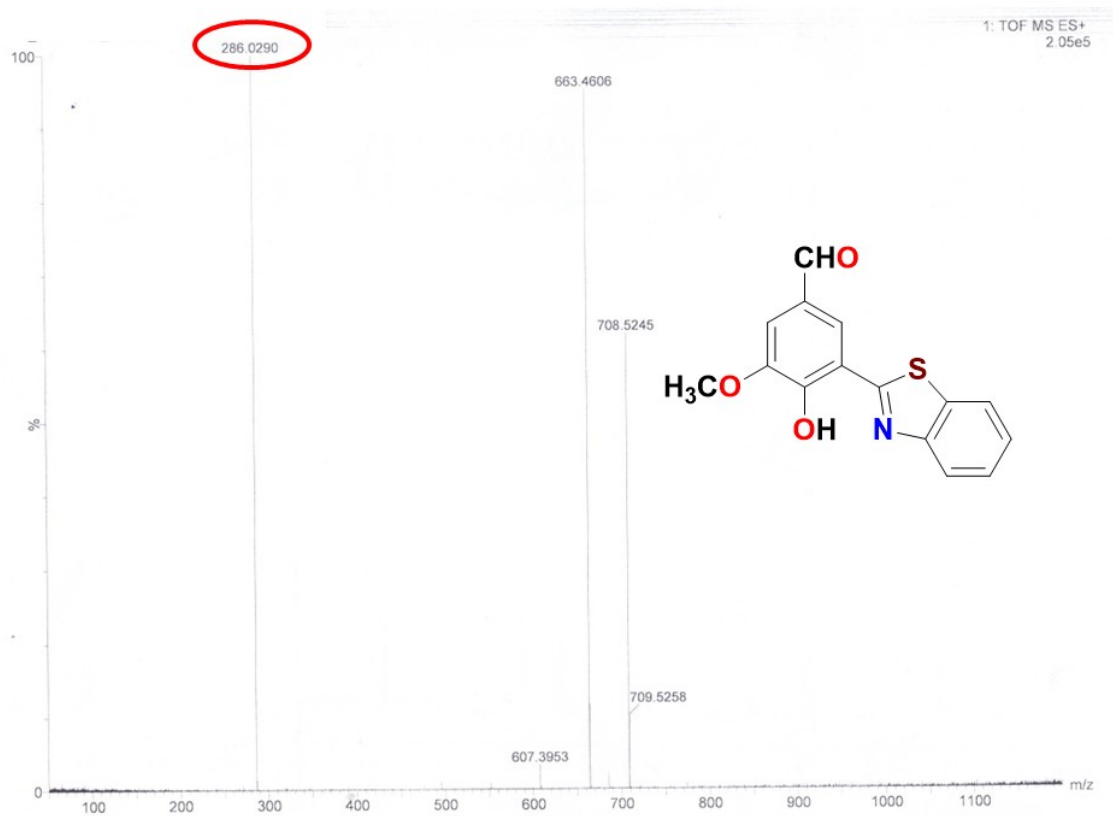

**Figure S3:** ESI-MS of 3BTHMB.

### 3. Table for crystallographic parameters of 3BTHMB.

**Table S1: Crystallographic parameters of 3BTHMB**

| Parameters                                               | <b>3BTHMB</b>     |
|----------------------------------------------------------|-------------------|
| <b>Formula</b>                                           | C10 H10 O5        |
| <b>Formula Weight</b>                                    | 210.05            |
| <b>Crystal System</b>                                    | monoclinic        |
| <b>Space group</b>                                       | P 21 <sub>c</sub> |
| <b>a [Å]</b>                                             | 7.267(8)          |
| <b>b [Å]</b>                                             | 18.18(2)          |
| <b>c [Å]</b>                                             | 7.017(8)          |
| <b><math>\alpha</math> [°]</b>                           | 90                |
| <b><math>\beta</math> [°]</b>                            | 94.884(14)        |
| <b><math>\gamma</math> [°]</b>                           | 90                |
| <b>V [Å<sup>3</sup>]</b>                                 | 923.7(18)         |
| <b>h, k, l (max.)</b>                                    | 8,20,7            |
| <b>Z</b>                                                 | 4                 |
| <b>D(calc) [g/cm<sup>-3</sup>]</b>                       | 1.500             |
| <b>F(000)</b>                                            | 440               |
| <b>Temperature (K)</b>                                   | 296               |
| <b><math>\theta</math> Min-Max [°]</b>                   | 2.2, 23.8         |
| <b>No. of unique data</b>                                | 1396              |
| <b>R(int)</b>                                            | 0.068             |
| <b>Observed data [I &gt; 2.0 <math>\sigma</math>(I)]</b> | 675               |
| <b>R1, wR2</b>                                           | 0.0583, 0.1321    |
| <b>GOF on F<sup>2</sup></b>                              | 1.140             |

#### 4. ORTEP diagram of 3BTHMB.

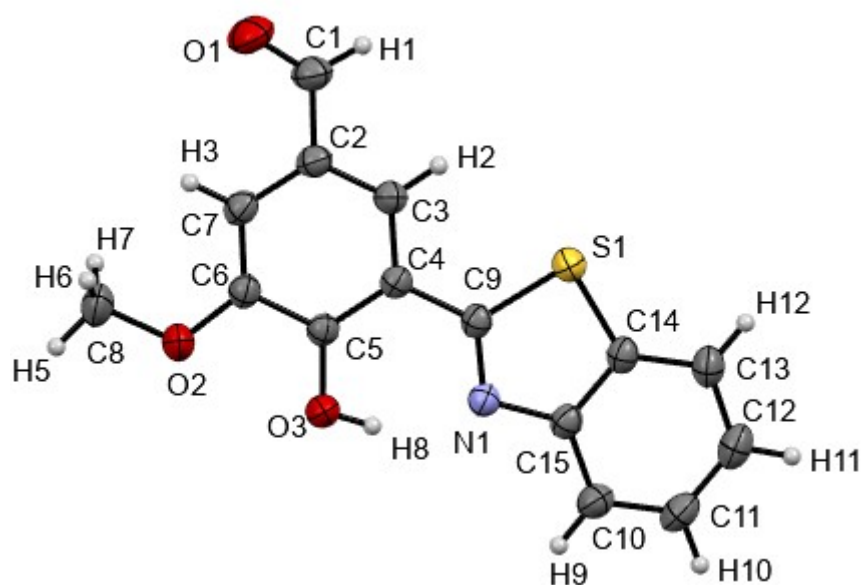

**Figure S4.** ORTEP diagram of **3BTHMB** with thermal ellipsoids at 30% probability.

#### 5. Various types of Hydrogen bonded forms possible in 3BTHMB.

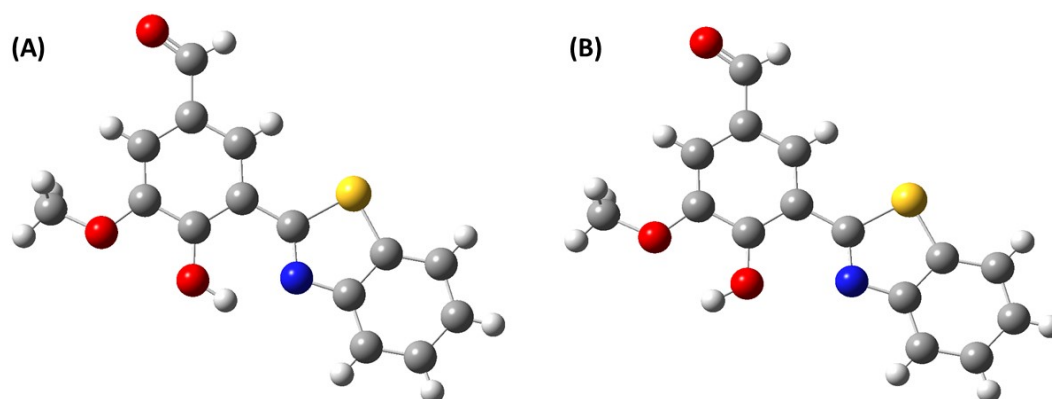

**Scheme S1.** **3BTHMB** with (A) OH atom bonded to N atom, (B) OH atom bonded to OCH<sub>3</sub> group.

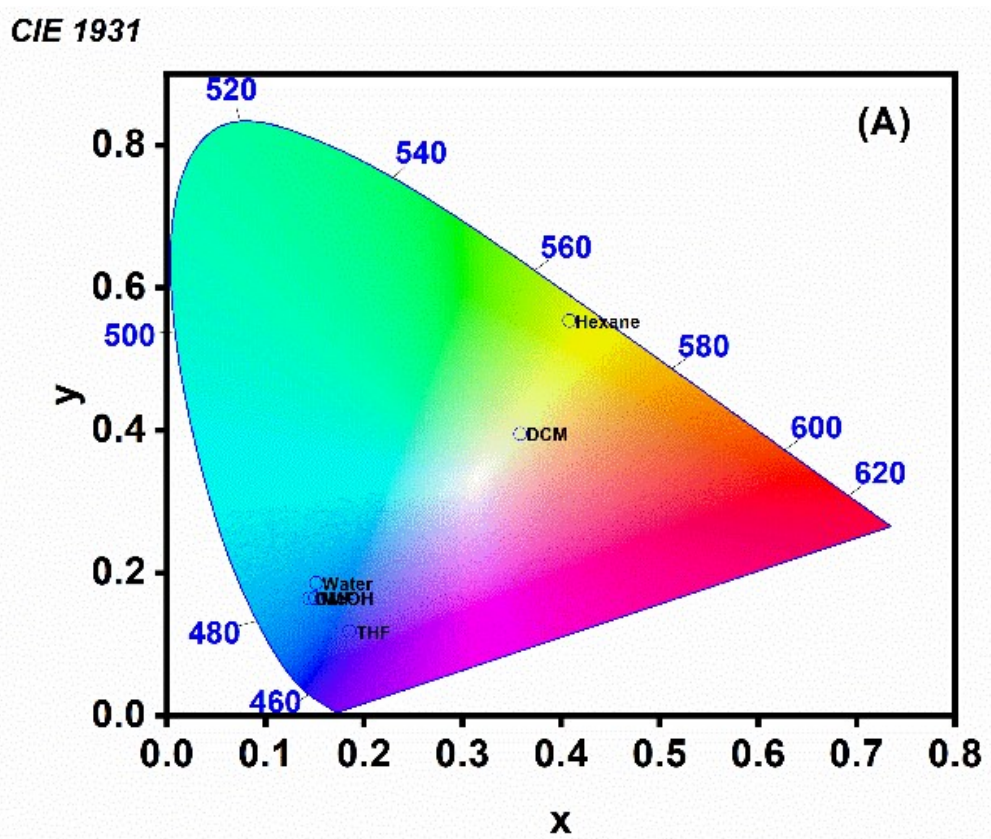

6. CIE diagram of 3BTHMB in various solvents, acid effect.

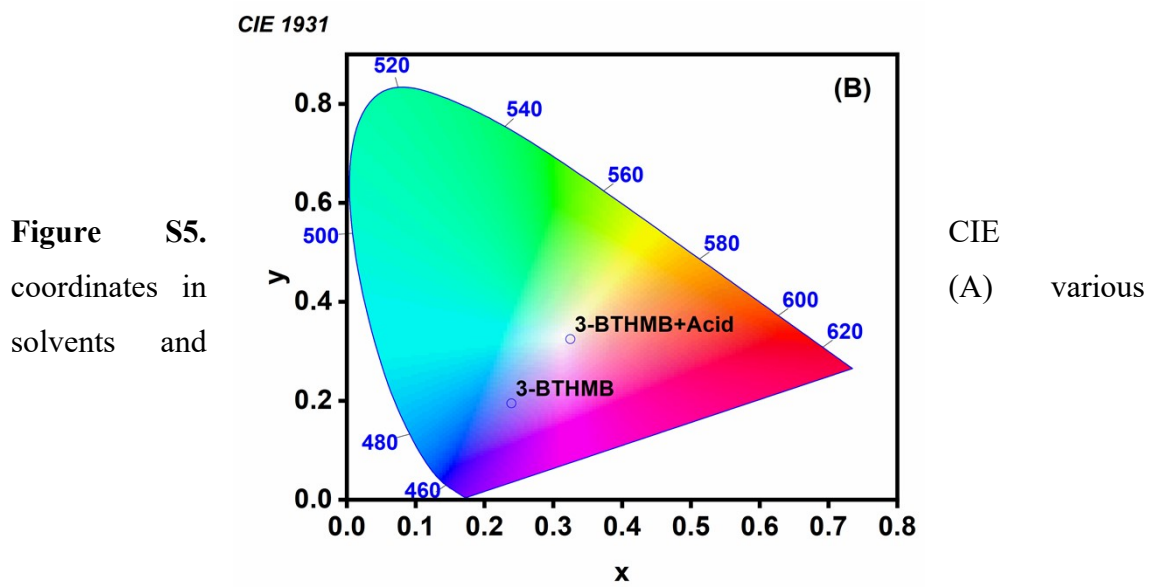

(B) in presence of acid in THF

7. Lifetime emission decays of 3BTHMB in various solvents (10  $\mu\text{M}$ ) for the entire spectral range.

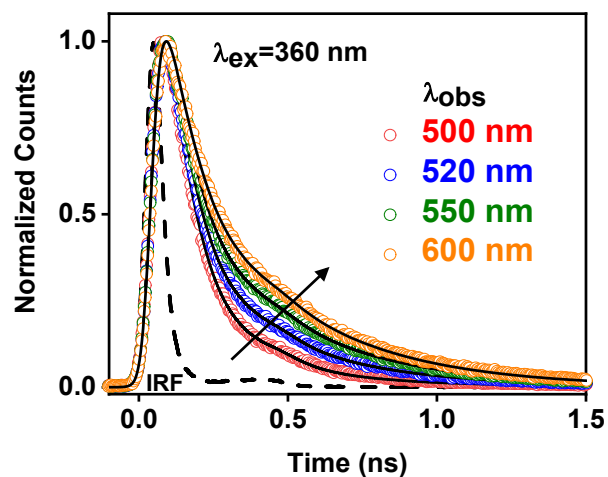

**Figure S6:** Lifetime emission decays of 3BTHMB in hexane (10  $\mu\text{M}$ ). The excitation and monitoring wavelengths are provided in the insets.

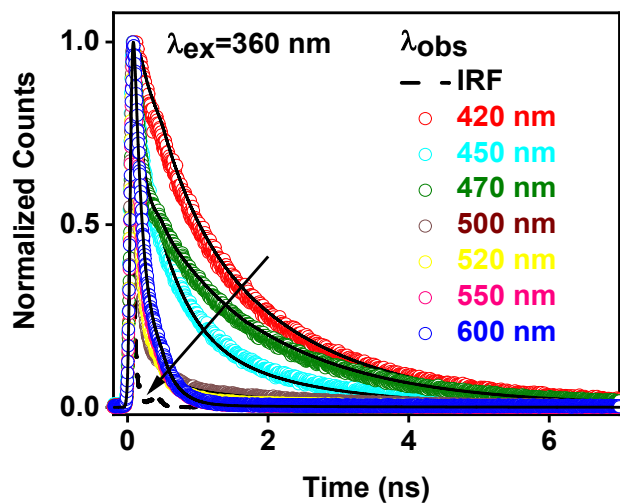

**Figure S7:** Lifetime emission decays of 3BTHMB in DCM (10  $\mu\text{M}$ ). The excitation and monitoring wavelengths are provided in the insets.

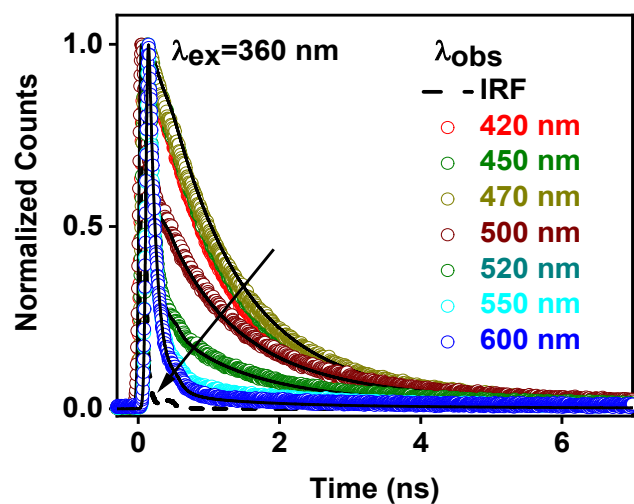

**Figure S8:** Lifetime emission decays of **3BTHMB** in THF (10  $\mu\text{M}$ ). The excitation and monitoring wavelengths are provided in the insets.

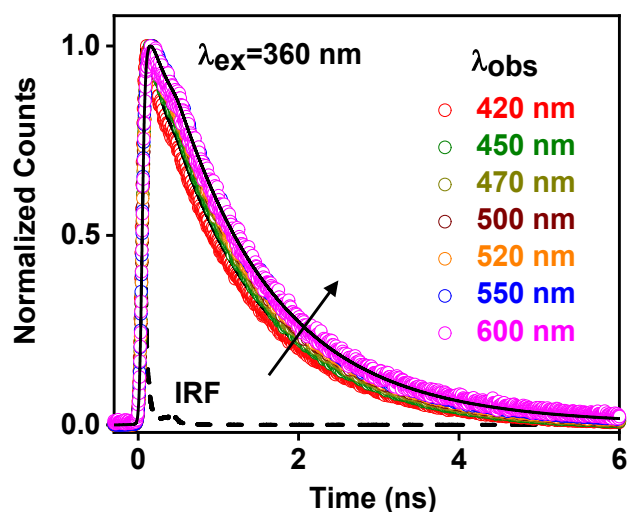

**Figure S9:** Lifetime emission decays of **3BTHMB** in DMF (10  $\mu\text{M}$ ). The excitation and monitoring wavelengths are provided in the insets.



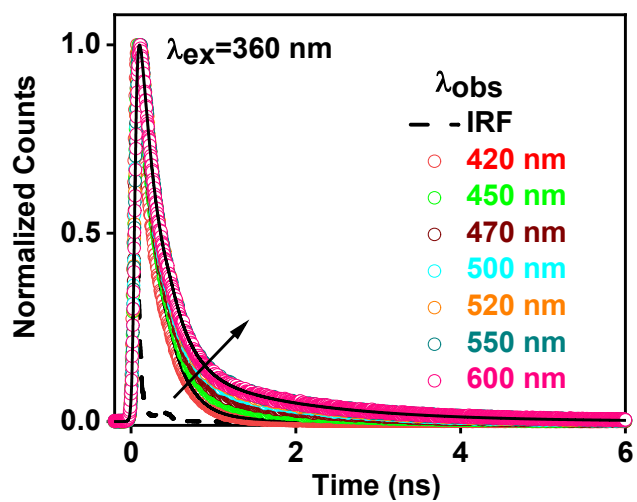

**Figure S10:** Lifetime emission decays of **3BTHMB** in MeOH (10  $\mu\text{M}$ ). The excitation and monitoring wavelengths are provided in the insets.

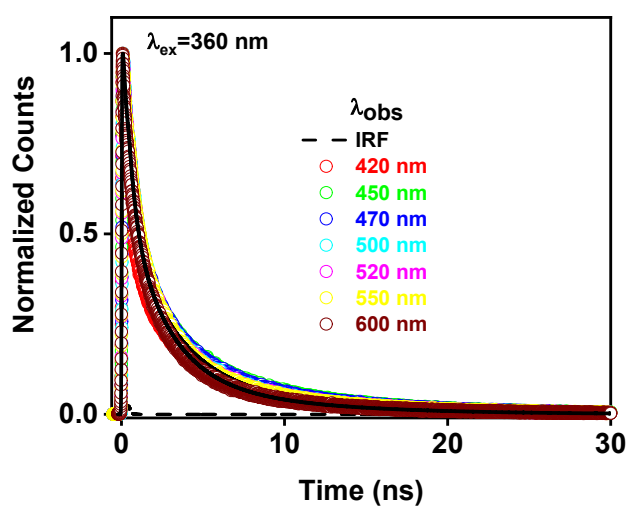

**Figure S11:** Lifetime emission decays of **3BTHMB** in water at pH 7.4 (10  $\mu\text{M}$ ). The excitation and monitoring wavelengths are provided in the insets.

### 8. Table for Excited state lifetime parameters of 3BTHMB in various solvents.

(In the subsequent tables (S2-S7), data is presented upon normalisation to 100.  $\alpha_i$ : s and  $c_i$ :s denotes the amplitudes and contributions to the excited state population. The error in estimation of the lifetimes is around 10%.)

**Table S2: Hexane**

| $\lambda_{obs}$<br>(nm) | $\tau_1$ (ns) | $\alpha_1$ | $c_1$ | $\tau_2$ (ns) | $\alpha_2$ | $c_2$ |
|-------------------------|---------------|------------|-------|---------------|------------|-------|
| 500                     |               | 94         | 80    |               | 6          | 20    |
| 520                     |               | 83         | 55    |               | 17         | 45    |
| 550                     |               | 72         | 39    |               | 28         | 61    |
|                         | <b>0.10</b>   |            |       | <b>0.60</b>   |            |       |
| 600                     |               | 62         | 29    |               | 38         | 71    |

**Table S3: DCM**

| $\lambda_{obs}$<br>(nm) | $\tau_1$ (ns) | $\alpha_1$ | $c_1$ | $\tau_2$ (ns) | $\alpha_2$ | $c_2$ | $\tau_3$ (ns) | $\alpha_3$ | $c_3$ |
|-------------------------|---------------|------------|-------|---------------|------------|-------|---------------|------------|-------|
| 420                     |               | 21         | 4     |               | 58         | 40    |               | 21         | 56    |
| 450                     |               | 4          | 1     |               | 37         | 14    |               | 59         | 85    |
| 470                     |               | 41         | 5     |               | 11         | 6     |               | 48         | 89    |
| 500                     | <b>0.12</b>   | 88         | 38    | <b>0.50</b>   | 8          | 15    | <b>1.8</b>    | 4          | 47    |
| 520                     |               | 93         | 66    |               | 5          | 13    |               | 2          | 21    |
| 550                     |               | 94         | 79    |               | 5          | 17    |               | 1          | 4     |
| 600                     |               | 97         | 85    |               | 2          | 14    |               | 1          | 1     |

**Table S4: THF**

| $\lambda_{\text{obs}}$<br>(nm) | $\tau_1$ (ns) | $\alpha_1$ | $c_1$ | $\tau_2$ (ns) | $\alpha_2$ | $c_2$ | $\tau_3$ (ns) | $\alpha_3$ | $c_3$ |
|--------------------------------|---------------|------------|-------|---------------|------------|-------|---------------|------------|-------|
| 420                            |               | 17         | 2     |               | 79         | 44    |               | 4          | 13    |
| 450                            |               | 11         | 1     |               | 84         | 45    |               | 5          | 21    |
| 470                            |               | 10         | 1     |               | 80         | 47    |               | 10         | 29    |
| 500                            | <b>0.10</b>   | 39         | 4     | <b>0.88</b>   | 50         | 25    | <b>3.3</b>    | 11         | 42    |
| 520                            |               | 74         | 14    |               | 20         | 18    |               | 6          | 45    |
| 550                            |               | 93         | 41    |               | 5          | 16    |               | 2          | 35    |
| 600                            |               | 97         | 69    |               | 2          | 22    |               | 1          | 18    |

**Table S5: DMF**

| $\lambda_{\text{obs}}$<br>(nm) | $\tau_1$ (ns) | $\alpha_1$ | $c_1$ | $\tau_2$ (ns) | $\alpha_2$ | $c_2$ |
|--------------------------------|---------------|------------|-------|---------------|------------|-------|
| 420                            |               | 97         | 94    |               | 3          | 6     |
| 450                            |               | 94         | 89    |               | 6          | 11    |
| 470                            |               | 91         | 85    |               | 9          | 15    |
| 500                            | <b>1.2</b>    | 87         | 78    | <b>4.0</b>    | 13         | 22    |
| 520                            |               | 85         | 77    |               | 15         | 23    |
| 550                            |               | 84         | 75    |               | 16         | 25    |
| 600                            |               | 83         | 74    |               | 17         | 26    |

**Table S6: MeOH**

| $\lambda_{\text{obs}}$<br>(nm) | $\tau_1$ (ns) | $\alpha_1$ | $c_1$ | $\tau_2$ (ns) | $\alpha_2$ | $c_2$ |
|--------------------------------|---------------|------------|-------|---------------|------------|-------|
| 420                            |               | 99         | 95    |               | 1          | 5     |
| 450                            |               | 95         | 75    |               | 5          | 25    |
| 470                            |               | 93         | 65    |               | 7          | 35    |
| 500                            | <b>0.23</b>   | 90         | 58    | <b>1.5</b>    | 10         | 42    |
| 520                            |               | 88         | 55    |               | 12         | 45    |
| 550                            |               | 88         | 54    |               | 12         | 46    |
| 600                            |               | 88         | 54    |               | 12         | 46    |

**Table S7: Water at pH 7.4**

| $\lambda_{\text{obs}}$<br>(nm) | $\tau_1$ (ns) | $\alpha_1$ | $c_1$ | $\tau_2$ (ns) | $\alpha_2$ | $c_2$ | $\tau_3$ (ns) | $\alpha_3$ | $c_3$ |
|--------------------------------|---------------|------------|-------|---------------|------------|-------|---------------|------------|-------|
| 420                            |               | 50         | 11    |               | 36         | 41    |               | 14         | 48    |
| 450                            |               | 49         | 11    |               | 36         | 40    |               | 15         | 49    |
| 470                            |               | 50         | 12    |               | 37         | 44    |               | 13         | 44    |
| 500                            | <b>0.34</b>   | 52         | 13    | <b>1.9</b>    | 37         | 47    | <b>6.4</b>    | 11         | 40    |
| 520                            |               | 53         | 14    |               | 36         | 47    |               | 11         | 39    |
| 550                            |               | 53         | 14    |               | 37         | 49    |               | 10         | 37    |
| 600                            |               | 47         | 10    |               | 43         | 50    |               | 10         | 40    |

### 9. pK<sub>a</sub> calculation for 3BTHMB

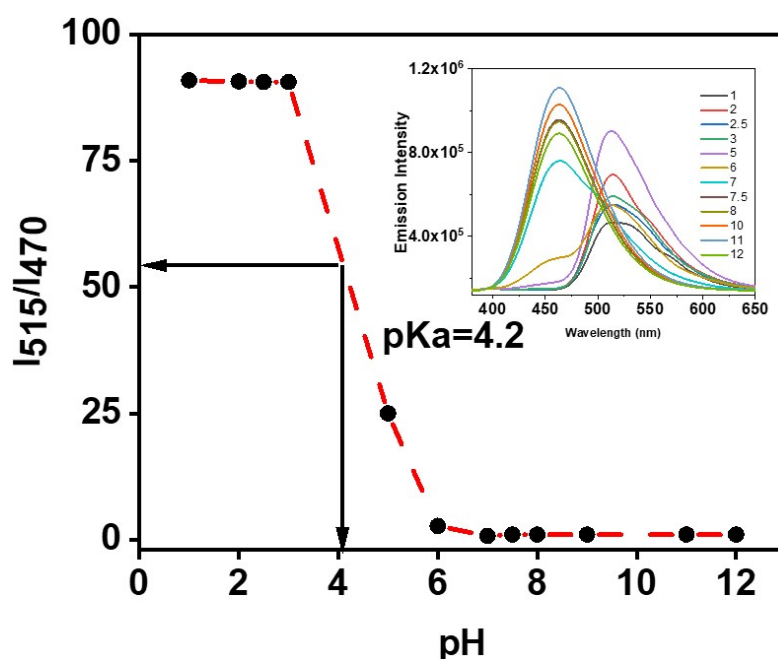

**Figure S12:** Plot of emission intensity ratio vs. pH to obtain pK<sub>a</sub> of 3BTHMB, (inset) Emission spectra in various pH solutions.

### 10. Table for Excited state lifetime parameters of 3BTHMB at pH 4.2

**Table S8:** Data is presented upon normalisation to 100.  $\alpha_i$ 's and  $c_i$ 's denotes the amplitudes and contributions to the excited state population. The error in estimation of the lifetimes is around 10%

| $\lambda_{\text{obs}}$<br>(nm) | $\tau_1$ (ns) | $\alpha_1$ | $c_1$ | $\tau_2$ (ns) | $\alpha_2$ | $c_2$ | $\tau_3$ (ns) | $\alpha_3$ | $c_3$ |
|--------------------------------|---------------|------------|-------|---------------|------------|-------|---------------|------------|-------|
| 420                            |               | 78         | 17    |               | 18         | 44    |               | 4          | 39    |
| 450                            |               | 77         | 16    |               | 19         | 45    |               | 4          | 39    |
| 470                            |               | 73         | 13    |               | 22         | 47    |               | 5          | 40    |
| 500                            | 0.14          | 65         | 6     | 1.50          | 22         | 25    | 7.4           | 13         | 69    |
| 520                            |               | 62         | 5     |               | 20         | 18    |               | 18         | 77    |
| 550                            |               | 62         | 4     |               | 19         | 16    |               | 19         | 80    |
| 600                            |               | 72         | 8     |               | 17         | 22    |               | 11         | 70    |

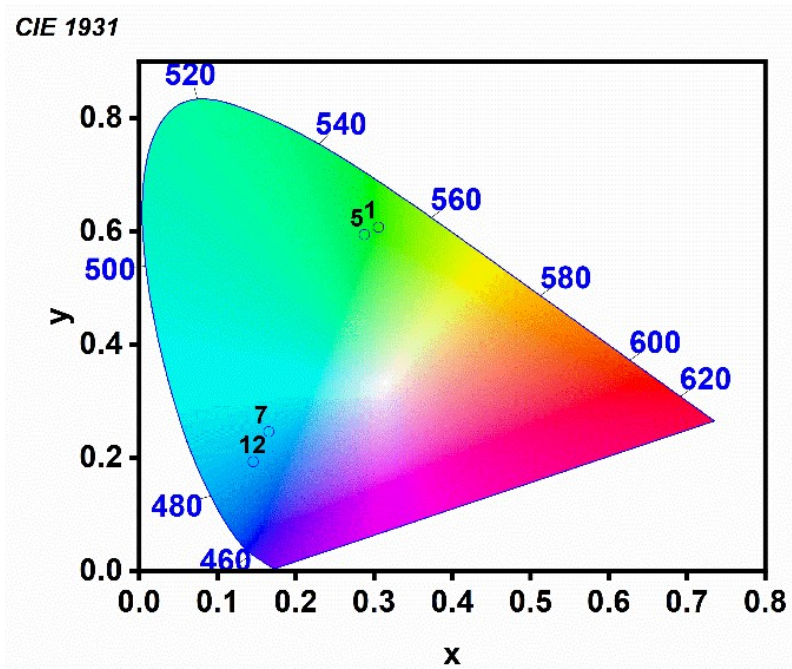

11. CIE coordinates in at 4 pH values.

Figure S13. CIE coordinates in at 4 pH values.

## 12. Emission spectra corresponding to amine vapor detection and subsequent

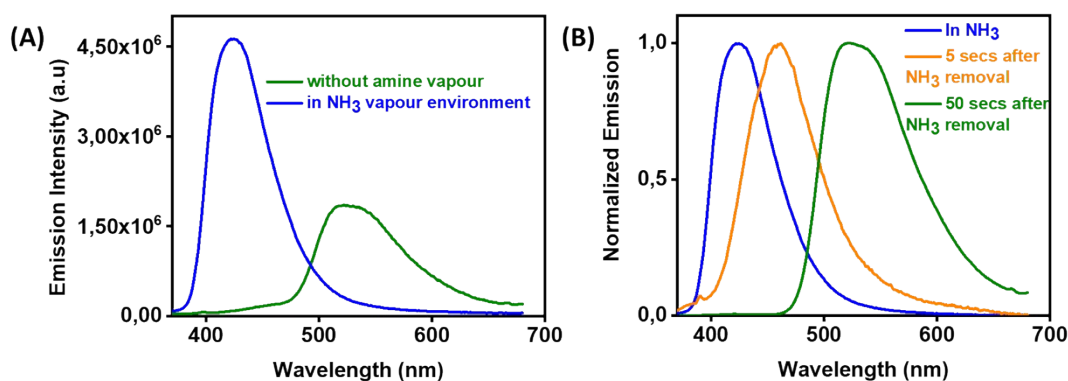

regeneration.

**Figure S14.** (A) Emission spectra of filter paper impregnated with **3BTHMB** (green curve) and upon exposure to NH<sub>3</sub> vapour (blue curve). (B) Regeneration of the emission spectra of **3BTHMB** upon removal of NH<sub>3</sub> source.

The experimental procedure for obtaining the above spectra (S14 A and B) are as follows: The emission spectrum of a filter paper coated with **3BTHMB** was recorded. Following this, a 5 mL vial containing ammonia was introduced inside the fluorimeter and an emission spectrum was recorded after a few seconds to ensure there is enough vapour interacting with **3BTHMB** coated on filter paper. For recording the recovery experiments, the vial was removed, and stopwatch was started. After 5 secs, a shifted emission spectrum was observed. After 50 secs, the recorded emission spectrum was practically similar to the one observed for **3BTHMB** without NH<sub>3</sub> vapour. It is to be mentioned that the background scattering from the filter paper needed to be subtracted from the emission spectra recorded. For doing so, emission spectrum of a blank filter paper was recorded using the same parameters employed for the emission experiments (Ex: 360 nm. Start: 375 nm, End: 700 nm, Slits: 2,2)
